# Supplementary material
Source: PubMed Central journal article supplement (PMC6478540)
Supplement: NIHMS1518915-supplement-1.pdf [file NIHMS1518915-supplement-1.pdf]

**Assessing the Role of 98 Established Loci for Body Mass Index in American Indians**

Yunhua L. Muller, Robert L. Hanson, Paolo Piaggi, Peng Chen, Gregory Wiessner, Chidinma Okani, Graham Skelton, Sayuko Kobes,  
Wen-Chi Hsueh, William C. Knowler, Clifton Bogardus and Leslie J. Baier

Corresponding author:

Yunhua Muller Ph.D.

Diabetes Molecular Genetics Section

NIDDK, NIH

445 North 5<sup>th</sup> street

Phoenix, AZ 85004, USA

Tel: (602) 440-6576 Fax: (602) 253-4140

Email: [ymuller@mail.nih.gov](mailto:ymuller@mail.nih.gov)

**Table S1:** The 40 lead SNPs and their respective proxies which were used for genotyping in Pima Indian.

| Locus            | Lead SNP   |            | Proxy SNP   |            | r <sup>2</sup><br>Pima Indian |
|------------------|------------|------------|-------------|------------|-------------------------------|
|                  | Rs#        | Allele R/N | Rs#         | Allele R/N |                               |
| <i>CALCR</i>     | rs9641123  | C/G        | rs5014937   | C/A        | 1                             |
| <i>ADPGK</i>     | rs7164727  | T/C        | rs8030477   | T/C        | 0.98                          |
| <i>SMG6</i>      | rs9914578  | G/C        | rs4061660   | A/G        | 1                             |
| <i>NRXN3</i>     | rs10150332 | C/T        | rs72690737  | C/T        | 1                             |
| <i>EPB41L4B</i>  | rs6477694  | C/T        | rs10759329  | A/G        | 0.93                          |
| <i>FIGN</i>      | rs1460676  | C/T        | rs16848820  | G/C        | 0.97                          |
| <i>LOC284260</i> | rs7239883  | G/A        | rs183552    | C/T        | 0.93                          |
| <i>RASA2</i>     | rs16851483 | T/G        | rs77586571  | T/C        | 0.99                          |
| <i>ASB4</i>      | rs6465468  | T/G        | rs763464    | C/T        | 0.98                          |
| <i>MIR548X2</i>  | rs9540493  | A/G        | rs1333010   | G/A        | 0.98                          |
| <i>FOXO3</i>     | rs9400239  | C/T        | rs9374040   | A/G        | 0.93                          |
| <i>ELAVL4</i>    | rs11583200 | C/T        | rs12724893  | G/A        | 0.97                          |
| <i>MTIF3</i>     | rs4771122  | G/A        | rs4771127   | A/C        | 0.97                          |
| <i>TLR4</i>      | rs1928295  | T/C        | rs7038943   | T/C        | 0.99                          |
| <i>AGBL4</i>     | rs657452   | A/G        | rs666486    | T/C        | 0.97                          |
| <i>UBE2E3</i>    | rs1528435  | T/C        | rs1406257   | G/A        | 0.91                          |
| <i>EHBP1</i>     | rs11688816 | G/A        | rs2710638   | G/A        | 0.97                          |
| <i>PGPEP1</i>    | rs17724992 | A/G        | rs12459368  | A/G        | 0.98                          |
| <i>CLIP1</i>     | rs11057405 | G/A        | rs116896792 | T/C        | 0.86                          |
| <i>LINGO2</i>    | rs10968576 | G/A        | rs17770336  | T/C        | 1                             |
| <i>USP37</i>     | rs492400   | C/T        | rs642520    | G/A        | 0.99                          |
| <i>SCARB2</i>    | rs17001654 | G/C        | rs72655539  | A/G        | 0.89                          |
| <i>STXBP6</i>    | rs10132280 | C/A        | rs11624623  | A/G        | 0.97                          |
| <i>GBE1</i>      | rs3849570  | A/C        | rs11711331  | A/G        | 1                             |
| <i>KAT8</i>      | rs9925964  | A/G        | rs6565217   | A/G        | 0.97                          |
| <i>FHIT</i>      | rs2365389  | C/T        | rs4688379   | G/A        | 0.91                          |
| <i>TFAP2B</i>    | rs987237   | G/A        | rs4715207   | T/C        | 1                             |
| <i>ETS2</i>      | rs2836754  | C/T        | rs8128163   | G/A        | 0.90                          |
| <i>HNF4G</i>     | rs4735692  | A/G        | rs2596125   | C/T        | 0.97                          |
| <i>LOC285762</i> | rs9374842  | T/C        | rs1329530   | T/C        | 1                             |
| <i>CBLN1</i>     | rs2080454  | C/A        | rs13332755  | T/G        | 0.94                          |
| <i>ETV5</i>      | rs9816226  | T/A        | rs73052033  | C/T        | 1                             |
| <i>MIR548A2</i>  | rs1441264  | A/G        | rs9544948   | A/G        | 0.99                          |
| <i>SEC16B</i>    | rs543874   | G/A        | rs589500    | T/C        | 1                             |
| <i>RALYL</i>     | rs2033732  | C/T        | rs6473525   | G/A        | 0.95                          |
| <i>INO80E</i>    | rs4787491  | G/A        | rs3814881   | A/G        | 0.99                          |

|                 |            |     |            |     |      |
|-----------------|------------|-----|------------|-----|------|
| <i>ZZZ3</i>     | rs17381664 | C/T | rs12728967 | C/T | 0.97 |
| <i>NT5C2</i>    | rs11191560 | C/T | rs77180047 | A/G | 1    |
| <i>DMXL2</i>    | rs3736485  | A/G | rs12101730 | C/T | 1    |
| <i>HSD17B12</i> | rs2176598  | T/C | rs3736505  | G/A | 0.99 |

The risk allele is defined as the allele with higher risk for BMI in Europeans.  $r^2$  was determined from whole genome sequence data of 266 full-heritage Pima Indians.

**Table S2.** Analysis of 98 established BMI SNPs with maximum BMI in adulthood, maximum BMI recorded from a non-diabetic exam and maximum BMI z-score in childhood in longitudinally studied full-heritage Pima Indians

| Lead SNP    | Locus (in/nearest) | Allele R/N | Full-heritage Pima Indians |           |                          |                            |                                          |                            |                                |              |      | Reported Meta-Analysis GIANT |                        |      | Heterogeneity      |                  |
|-------------|--------------------|------------|----------------------------|-----------|--------------------------|----------------------------|------------------------------------------|----------------------------|--------------------------------|--------------|------|------------------------------|------------------------|------|--------------------|------------------|
|             |                    |            | Max-BMI Adulthood (n=3491) |           |                          |                            | Max-BMI (nondiabetic) Adulthood (n=2862) |                            | Max-Z-score Childhood (n=1958) |              |      | BMI Adulthood (n=339224)     |                        |      | I <sup>2</sup> (%) | P <sub>het</sub> |
|             |                    |            | RAF                        | Beta (SD) | Beta (Log <sub>e</sub> ) | P                          | Beta (Log <sub>e</sub> )                 | P                          | Beta (SD)                      | P            | RAF  | Beta (SD)                    | P                      |      |                    |                  |
| rs2867125   | <i>TMEM18</i>      | C/T        | 0.86                       | 0.13      | 0.030                    | <b>3.0x10<sup>-4</sup></b> | 0.035                                    | <b>6.0x10<sup>-5</sup></b> | 0.131                          | <b>0.005</b> | 0.87 | 0.06                         | 4.4 x10 <sup>-52</sup> | 75.2 | <b>0.045</b>       |                  |
| rs7903146   | <i>TCF7L2</i>      | C/T        | 0.92                       | 0.16      | 0.039                    | <b>4.9x10<sup>-4</sup></b> | 0.051                                    | <b>2.0x10<sup>-5</sup></b> | 0.088                          | 0.18         | 0.75 | 0.02                         | 1.1x10 <sup>-12</sup>  | 88.2 | <b>0.004</b>       |                  |
| rs13041126  | <i>MRPS33P4</i>    | T/C        | 0.67                       | 0.08      | 0.018                    | <b>0.004</b>               | 0.019                                    | <b>0.006</b>               | 0.051                          | 0.16         | 0.73 | 0.02                         | 6.5x10 <sup>-7</sup>   | 78.6 | <b>0.031</b>       |                  |
| rs12885454  | <i>PRKD1</i>       | C/A        | 0.78                       | 0.09      | 0.020                    | <b>0.005</b>               | 0.016                                    | <b>0.04</b>                | 0.066                          | 0.11         | 0.63 | 0.02                         | 9.1x10 <sup>-11</sup>  | 78.2 | <b>0.032</b>       |                  |
| rs6091540   | <i>ZFP64</i>       | C/T        | 0.67                       | 0.07      | 0.016                    | <b>0.01</b>                | 0.017                                    | <b>0.01</b>                | 0.033                          | 0.36         | 0.73 | 0.02                         | 2.1x10 <sup>-8</sup>   | 70.3 | 0.066              |                  |
| rs7193144   | <i>FTO</i>         | C/T        | 0.14                       | 0.10      | 0.022                    | <b>0.01</b>                | 0.029                                    | <b>0.002</b>               | 0.14                           | <b>0.003</b> | 0.44 | 0.08                         | 6.2x10 <sup>-142</sup> | 0.0  | 0.686              |                  |
| rs977747    | <i>TAL1</i>        | T/G        | 0.74                       | 0.08      | 0.017                    | <b>0.02</b>                | 0.021                                    | <b>0.004</b>               | 0.061                          | 0.13         | 0.47 | 0.02                         | 2.2x10 <sup>-8</sup>   | 75.2 | <b>0.044</b>       |                  |
| rs9641123*  | <i>CALCR</i>       | C/G        | 0.09                       | 0.11      | 0.023                    | <b>0.02</b>                | 0.021                                    | <b>0.05</b>                | 0.059                          | 0.32         | 0.39 | 0.01                         | 1.8x10 <sup>-7</sup>   | 79.2 | <b>0.028</b>       |                  |
| rs10938397  | <i>GNPDA2</i>      | G/A        | 0.31                       | 0.06      | 0.014                    | <b>0.02</b>                | 0.014                                    | <b>0.05</b>                | 0.096                          | <b>0.009</b> | 0.43 | 0.03                         | 1.4x10 <sup>-40</sup>  | 27.6 | 0.240              |                  |
| rs17203016  | <i>CREB1</i>       | G/A        | 0.15                       | 0.08      | 0.017                    | <b>0.03</b>                | 0.016                                    | 0.06                       | 0.073                          | 0.12         | 0.20 | 0.02                         | 3.4x10 <sup>-8</sup>   | 59.2 | 0.117              |                  |
| rs10733682  | <i>LMX1B</i>       | A/G        | 0.75                       | 0.06      | 0.014                    | <b>0.04</b>                | 0.017                                    | <b>0.02</b>                | 0.056                          | 0.15         | 0.43 | 0.02                         | 2.5x10 <sup>-10</sup>  | 41.1 | 0.192              |                  |
| rs2531995   | <i>ADCY9</i>       | T/C        | 0.18                       | 0.07      | 0.016                    | <b>0.04</b>                | 0.010                                    | 0.21                       | 0.082                          | 0.06         | 0.59 | 0.02                         | 7.6x10 <sup>-10</sup>  | 53.5 | 0.142              |                  |
| rs758747    | <i>NLRC3</i>       | T/C        | 0.11                       | 0.07      | 0.018                    | <b>0.05</b>                | 0.014                                    | 0.14                       | 0.074                          | 0.15         | 0.27 | 0.02                         | 1.5x10 <sup>-10</sup>  | 37.7 | 0.205              |                  |
| rs7164727*  | <i>ADPGK</i>       | T/C        | 0.40                       | 0.05      | 0.011                    | 0.06                       | 0.016                                    | 0.01                       | 0.039                          | 0.25         | 0.78 | 0.01                         | 3.9x10 <sup>-9</sup>   | 43.8 | 0.182              |                  |
| rs9914578*  | <i>SMG6</i>        | G/C        | 0.16                       | 0.07      | 0.014                    | 0.07                       | 0.009                                    | 0.27                       | -0.019                         | 0.68         | 0.17 | 0.02                         | 2.1x10 <sup>-8</sup>   | 46.5 | 0.172              |                  |
| rs10150332* | <i>NRXN3</i>       | C/T        | 0.36                       | 0.03      | 0.011                    | 0.08                       | 0.008                                    | 0.24                       | -0.009                         | 0.80         | 0.28 | 0.02                         | 1.1x10 <sup>-7</sup>   | 0.0  | 0.606              |                  |
| rs4740619   | <i>C9ORF93</i>     | T/C        | 0.04                       | -0.14     | -0.028                   | 0.09                       | -0.033                                   | 0.06                       | -0.104                         | 0.26         | 0.53 | 0.01                         | 6.4x10 <sup>-9</sup>   | 76.4 | <b>0.040</b>       |                  |
| rs6477694*  | <i>EPB41LAB</i>    | C/T        | 0.49                       | 0.04      | 0.010                    | 0.10                       | 0.010                                    | 0.14                       | 0.010                          | 0.77         | 0.36 | 0.01                         | 1.7x10 <sup>-8</sup>   | 37.3 | 0.207              |                  |
| rs1460676*  | <i>FIGN</i>        | C/T        | 0.07                       | 0.08      | 0.018                    | 0.11                       | 0.018                                    | 0.16                       | 0.143                          | <b>0.03</b>  | 0.22 | 0.02                         | 5.0x10 <sup>-8</sup>   | 22.2 | 0.257              |                  |
| rs29941     | <i>KCTD15</i>      | G/A        | 0.32                       | -0.04     | -0.010                   | 0.12                       | -0.011                                   | 0.14                       | 0.018                          | 0.64         | 0.67 | 0.01                         | 2.2x10 <sup>-8</sup>   | 70.4 | 0.066              |                  |
| rs7239883*  | <i>LOC284260</i>   | G/A        | 0.05                       | 0.09      | 0.020                    | 0.13                       | 0.025                                    | 0.08                       | 0.135                          | 0.09         | 0.32 | 0.01                         | 3.1x10 <sup>-7</sup>   | 41.7 | 0.190              |                  |
| rs16851483* | <i>RASA2</i>       | T/G        | 0.52                       | -0.04     | -0.009                   | 0.14                       | -0.011                                   | 0.09                       | 0.021                          | 0.55         | 0.09 | 0.04                         | 1.9x10 <sup>-10</sup>  | 88.6 | <b>0.003</b>       |                  |
| rs1514175   | <i>TNNI3K</i>      | A/G        | 0.74                       | 0.04      | 0.010                    | 0.17                       | 0.012                                    | 0.10                       | 0.051                          | 0.20         | 0.42 | 0.02                         | 2.5x10 <sup>-13</sup>  | 0.0  | 0.447              |                  |
| rs6465468*  | <i>ASB4</i>        | T/G        | 0.13                       | 0.05      | 0.012                    | 0.17                       | 0.012                                    | 0.21                       | 0.019                          | 0.70         | 0.68 | 0.01                         | 2.4x10 <sup>-6</sup>   | 0.0  | 0.351              |                  |
| rs6804842   | <i>RARB</i>        | G/A        | 0.58                       | 0.03      | 0.008                    | 0.18                       | 0.009                                    | 0.17                       | 0.003                          | 0.94         | 0.57 | 0.01                         | 8.0x10 <sup>-10</sup>  | 0.0  | 0.401              |                  |
| rs2241423   | <i>MAP2K5</i>      | G/A        | 0.12                       | 0.04      | 0.012                    | 0.23                       | 0.016                                    | 0.13                       | 0.031                          | 0.57         | 0.78 | 0.03                         | 2.3x10 <sup>-18</sup>  | 0.0  | 0.788              |                  |
| rs2112347   | <i>POC5</i>        | T/G        | 0.82                       | 0.04      | 0.010                    | 0.23                       | 0.015                                    | 0.08                       | 0.011                          | 0.81         | 0.62 | 0.02                         | 2.0x10 <sup>-17</sup>  | 0.0  | 0.563              |                  |
| rs7243357   | <i>GRP</i>         | T/G        | 0.55                       | 0.03      | 0.007                    | 0.25                       | 0.010                                    | 0.14                       | 0.039                          | 0.26         | 0.87 | 0.02                         | 9.1x10 <sup>-9</sup>   | 0.0  | 0.789              |                  |
| rs2815752   | <i>NEGR1</i>       | A/G        | 0.91                       | 0.05      | 0.012                    | 0.25                       | 0.009                                    | 0.45                       | 0.047                          | 0.44         | 0.65 | 0.03                         | 9.3x10 <sup>-25</sup>  | 0.0  | 0.600              |                  |
| rs3817334   | <i>MTCH2</i>       | T/C        | 0.50                       | 0.03      | 0.007                    | 0.25                       | 0.005                                    | 0.46                       | 0.037                          | 0.30         | 0.45 | 0.02                         | 1.2x10 <sup>-17</sup>  | 0.0  | 0.665              |                  |
| rs9540493*  | <i>MIR548X2</i>    | A/G        | 0.58                       | 0.03      | 0.007                    | 0.25                       | 0.003                                    | 0.60                       | 0.018                          | 0.61         | 0.45 | 0.01                         | 4.0x10 <sup>-9</sup>   | 0.0  | 0.405              |                  |
| rs7503807   | <i>RPTOR</i>       | A/C        | 0.96                       | 0.09      | 0.017                    | 0.26                       | 0.013                                    | 0.44                       | 0.078                          | 0.35         | 0.47 | 0.02                         | 5.7x10 <sup>-7</sup>   | 2.0  | 0.312              |                  |
| rs2820292   | <i>NAV1</i>        | C/A        | 0.38                       | 0.03      | 0.007                    | 0.26                       | 0.008                                    | 0.22                       | 0.018                          | 0.61         | 0.51 | 0.01                         | 5.5x10 <sup>-10</sup>  | 0.0  | 0.540              |                  |

|             |                  |     |      |       |        |      |        |      |        |              |      |      |                       |      |              |
|-------------|------------------|-----|------|-------|--------|------|--------|------|--------|--------------|------|------|-----------------------|------|--------------|
| rs9400239*  | <i>FOXO3</i>     | C/T | 0.63 | 0.03  | 0.007  | 0.28 | 0.007  | 0.27 | 0.062  | 0.08         | 0.70 | 0.01 | 6.8x10 <sup>-8</sup>  | 0.0  | 0.528        |
| rs713586    | <i>ADCY3</i>     | C/T | 0.18 | 0.04  | 0.008  | 0.33 | 0.010  | 0.26 | 0.089  | 0.06         | 0.52 | 0.02 | 9.9x10 <sup>-17</sup> | 0.0  | 0.601        |
| rs11583200* | <i>ELAVL4</i>    | C/T | 0.55 | 0.02  | 0.006  | 0.34 | 0.007  | 0.30 | 0.000  | 0.99         | 0.38 | 0.01 | 6.0x10 <sup>-9</sup>  | 0.0  | 0.649        |
| rs4771122*  | <i>MTIF3</i>     | G/A | 0.08 | 0.05  | 0.010  | 0.35 | 0.009  | 0.42 | -0.002 | 0.97         | 0.26 | 0.02 | 3.4x10 <sup>-10</sup> | 0.0  | 0.558        |
| rs1928295*  | <i>TLR4</i>      | T/C | 0.66 | 0.03  | 0.006  | 0.35 | 0.008  | 0.20 | 0.044  | 0.21         | 0.57 | 0.01 | 4.3x10 <sup>-10</sup> | 0.0  | 0.578        |
| rs7359397   | <i>SH2B1</i>     | T/C | 0.73 | -0.03 | -0.006 | 0.37 | 0.000  | 0.98 | -0.034 | 0.38         | 0.36 | 0.03 | 1.0x10 <sup>-23</sup> | 74.2 | <b>0.049</b> |
| rs657452*   | <i>AGBL4</i>     | A/G | 0.39 | 0.02  | 0.005  | 0.37 | 0.007  | 0.30 | 0.044  | 0.21         | 0.42 | 0.02 | 2.1x10 <sup>-13</sup> | 0.0  | 0.906        |
| rs1528435*  | <i>UBE2E3</i>    | T/C | 0.84 | -0.02 | -0.007 | 0.38 | -0.006 | 0.49 | -0.004 | 0.94         | 0.58 | 0.01 | 4.8x10 <sup>-9</sup>  | 0.0  | 0.328        |
| rs11688816* | <i>EHBP1</i>     | G/A | 0.58 | 0.02  | 0.005  | 0.38 | 0.005  | 0.44 | -0.002 | 0.95         | 0.46 | 0.01 | 3.8x10 <sup>-7</sup>  | 0.0  | 0.678        |
| rs206936    | <i>NUDT3</i>     | G/A | 0.65 | -0.02 | -0.006 | 0.38 | -0.001 | 0.90 | -0.005 | 0.90         | 0.17 | 0.01 | 3.3x10 <sup>-6</sup>  | 22.6 | 0.256        |
| rs17724992* | <i>PGPEP1</i>    | A/G | 0.63 | -0.02 | -0.005 | 0.40 | -0.004 | 0.55 | 0.005  | 0.89         | 0.69 | 0.01 | 7.8x10 <sup>-9</sup>  | 41.2 | 0.192        |
| rs7989336   | <i>HS6ST3</i>    | A/G | 0.01 | 0.07  | 0.028  | 0.46 | 0.014  | 0.73 | 0.113  | 0.61         | 0.42 | 0.01 | 2.1x10 <sup>-5</sup>  | 0.0  | 0.720        |
| rs1167827   | <i>HIP1</i>      | G/A | 0.08 | -0.04 | -0.008 | 0.48 | 0.002  | 0.87 | -0.044 | 0.49         | 0.54 | 0.02 | 2.0x10 <sup>-10</sup> | 33.8 | 0.219        |
| rs11057405* | <i>CLIP1</i>     | G/A | 0.93 | 0.03  | 0.007  | 0.49 | 0.005  | 0.64 | -0.027 | 0.64         | 0.91 | 0.03 | 1.2x10 <sup>-8</sup>  | 0.0  | 0.983        |
| rs1000940   | <i>RABEP1</i>    | G/A | 0.27 | -0.02 | -0.005 | 0.50 | -0.005 | 0.54 | -0.026 | 0.52         | 0.23 | 0.01 | 1.8x10 <sup>-8</sup>  | 24.2 | 0.251        |
| rs10767664  | <i>BDNF</i>      | A/T | 0.14 | 0.02  | 0.006  | 0.50 | 0.007  | 0.44 | 0.075  | 0.15         | 0.78 | 0.04 | 8.8x10 <sup>-25</sup> | 0.0  | 0.669        |
| rs10968576* | <i>LINGO2</i>    | G/A | 0.21 | 0.02  | 0.005  | 0.51 | 0.001  | 0.88 | -0.023 | 0.59         | 0.29 | 0.02 | 2.3x10 <sup>-14</sup> | 0.0  | 0.962        |
| rs492400*   | <i>USP37</i>     | C/T | 0.31 | -0.01 | -0.004 | 0.52 | -0.005 | 0.47 | -0.034 | 0.36         | 0.32 | 0.01 | 4.9x10 <sup>-7</sup>  | 0.0  | 0.387        |
| rs2245368   | <i>PMS2P11</i>   | C/T | 0.61 | -0.02 | -0.004 | 0.52 | -0.003 | 0.60 | -0.004 | 0.90         | 0.24 | 0.02 | 7.0x10 <sup>-8</sup>  | 41.4 | 0.191        |
| rs17001654* | <i>SCARB2</i>    | G/C | 0.16 | -0.02 | -0.005 | 0.53 | -0.008 | 0.35 | -0.007 | 0.89         | 0.16 | 0.03 | 5.0x10 <sup>-9</sup>  | 58.0 | 0.123        |
| rs10132280* | <i>STXBP6</i>    | C/A | 0.67 | 0.01  | 0.003  | 0.57 | 0.000  | 0.96 | -0.028 | 0.44         | 0.67 | 0.02 | 1.4x10 <sup>-11</sup> | 0.0  | 0.846        |
| rs3849570*  | <i>GBE1</i>      | A/C | 0.46 | -0.01 | -0.003 | 0.58 | 0.000  | 0.95 | 0.023  | 0.50         | 0.37 | 0.01 | 3.8x10 <sup>-8</sup>  | 0.0  | 0.441        |
| rs9925964*  | <i>KAT8</i>      | A/G | 0.35 | 0.01  | 0.003  | 0.58 | -0.002 | 0.80 | -0.037 | 0.29         | 0.61 | 0.01 | 9.4x10 <sup>-11</sup> | 0.0  | 0.942        |
| rs12286929  | <i>CADM1</i>     | G/A | 0.72 | 0.02  | 0.003  | 0.59 | 0.005  | 0.46 | -0.028 | 0.46         | 0.43 | 0.02 | 5.4x10 <sup>-13</sup> | 0.0  | 0.912        |
| rs13078807  | <i>CADM2</i>     | G/A | 0.01 | 0.10  | 0.022  | 0.59 | -0.005 | 0.91 | -0.105 | 0.66         | 0.18 | 0.02 | 3.7x10 <sup>-13</sup> | 0.0  | 0.664        |
| rs2365389*  | <i>FHIT</i>      | C/T | 0.07 | 0.03  | 0.006  | 0.59 | 0.010  | 0.43 | 0.037  | 0.58         | 0.66 | 0.01 | 1.4x10 <sup>-10</sup> | 0.0  | 0.720        |
| rs987237*   | <i>TFAP2B</i>    | G/A | 0.58 | 0.01  | 0.003  | 0.62 | 0.000  | 0.94 | 0.018  | 0.60         | 0.09 | 0.04 | 1.1x10 <sup>-30</sup> | 19.9 | 0.264        |
| rs2836754*  | <i>ETS2</i>      | C/T | 0.13 | -0.02 | -0.004 | 0.62 | -0.004 | 0.69 | -0.051 | 0.31         | 0.65 | 0.01 | 1.6x10 <sup>-8</sup>  | 0.0  | 0.411        |
| rs2890652   | <i>LRP1B</i>     | C/T | 0.01 | 0.07  | 0.015  | 0.62 | -0.006 | 0.87 | -0.027 | 0.87         | 0.12 | 0.02 | 1.2x10 <sup>-8</sup>  | 0.0  | 0.698        |
| rs13201877  | <i>IFNGR1</i>    | G/A | 0.03 | -0.02 | -0.009 | 0.63 | -0.009 | 0.62 | -0.101 | 0.23         | 0.08 | 0.02 | 4.3x10 <sup>-8</sup>  | 0.0  | 0.572        |
| rs4735692*  | <i>HNF4G</i>     | A/G | 0.06 | -0.04 | -0.005 | 0.67 | -0.013 | 0.31 | 0.056  | 0.42         | 0.56 | 0.02 | 6.1x10 <sup>-11</sup> | 27.1 | 0.242        |
| rs9374842*  | <i>LOC285762</i> | T/C | 0.86 | 0.02  | 0.003  | 0.68 | 0.011  | 0.23 | 0.139  | <b>0.005</b> | 0.74 | 0.01 | 7.2x10 <sup>-9</sup>  | 0.0  | 0.749        |
| rs4929949   | <i>RPL27A</i>    | C/T | 0.67 | 0.01  | 0.003  | 0.68 | 0.005  | 0.47 | 0.071  | 0.06         | 0.60 | 0.01 | 1.5x10 <sup>-8</sup>  | 0.0  | 0.933        |
| rs2080454*  | <i>CBLN1</i>     | C/A | 0.65 | 0.00  | -0.002 | 0.70 | 0.001  | 0.94 | 0.003  | 0.94         | 0.39 | 0.01 | 8.6x10 <sup>-9</sup>  | 0.0  | 0.670        |
| rs9816226*  | <i>ETV5</i>      | T/A | 0.07 | 0.01  | 0.004  | 0.74 | 0.004  | 0.73 | 0.057  | 0.40         | 0.85 | 0.03 | 6.0x10 <sup>-24</sup> | 0.0  | 0.745        |
| rs1441264*  | <i>MIR548A2</i>  | A/G | 0.73 | 0.01  | 0.002  | 0.78 | 0.003  | 0.62 | 0.114  | <b>0.003</b> | 0.55 | 0.01 | 3.0x10 <sup>-8</sup>  | 0.0  | 0.933        |
| rs11126666  | <i>KCNK3</i>     | A/G | 0.04 | 0.03  | 0.004  | 0.79 | 0.007  | 0.67 | -0.066 | 0.46         | 0.31 | 0.02 | 1.3x10 <sup>-9</sup>  | 0.0  | 0.872        |
| rs3810291   | <i>TMEM160</i>   | A/G | 0.66 | 0.01  | 0.002  | 0.81 | 0.003  | 0.62 | 0.035  | 0.33         | 0.63 | 0.02 | 6.4x10 <sup>-16</sup> | 0.0  | 0.730        |
| rs543874*   | <i>SEC16B</i>    | G/A | 0.21 | 0.01  | 0.002  | 0.83 | 0.004  | 0.60 | 0.039  | 0.36         | 0.27 | 0.04 | 2.3x10 <sup>-40</sup> | 0.0  | 0.367        |
| rs2033732*  | <i>RALYL</i>     | C/T | 0.87 | 0.02  | 0.002  | 0.86 | 0.006  | 0.52 | 0.076  | 0.12         | 0.76 | 0.01 | 2.3x10 <sup>-7</sup>  | 0.0  | 0.844        |
| rs4787491*  | <i>INO80E</i>    | G/A | 0.16 | 0.00  | 0.001  | 0.86 | -0.005 | 0.57 | -0.032 | 0.49         | 0.61 | 0.01 | 2.3x10 <sup>-6</sup>  | 0.0  | 0.734        |
| rs17381664* | <i>ZZZ3</i>      | C/T | 0.55 | 0.01  | 0.001  | 0.87 | -0.002 | 0.76 | 0.008  | 0.83         | 0.43 | 0.02 | 4.6x10 <sup>-11</sup> | 0.0  | 0.675        |
| rs11191560* | <i>NT5C2</i>     | C/T | 0.25 | 0.00  | -0.001 | 0.89 | 0.003  | 0.67 | 0.054  | 0.18         | 0.06 | 0.03 | 2.1x10 <sup>-9</sup>  | 0.3  | 0.317        |

|            |                  |     |             |       |        |      |        |      |        |             |      |      |                       |     |       |
|------------|------------------|-----|-------------|-------|--------|------|--------|------|--------|-------------|------|------|-----------------------|-----|-------|
| rs3736485* | <i>DMXL2</i>     | A/G | 0.46        | 0.00  | 0.001  | 0.90 | 0.001  | 0.85 | 0.016  | 0.65        | 0.43 | 0.01 | 4.5x10 <sup>-8</sup>  | 0.0 | 0.731 |
| rs7599312  | <i>ERBB4</i>     | G/A | 0.93        | 0.00  | -0.001 | 0.91 | 0.005  | 0.68 | 0.052  | 0.42        | 0.71 | 0.02 | 4.7x10 <sup>-11</sup> | 0.0 | 0.623 |
| rs17094222 | <i>HIF1AN</i>    | C/T | 0.33        | 0.00  | 0.001  | 0.91 | 0.001  | 0.88 | 0.028  | 0.45        | 0.21 | 0.02 | 2.2x10 <sup>-11</sup> | 0.0 | 0.414 |
| rs1555543  | <i>PTBP2</i>     | C/A | 0.54        | -0.01 | -0.001 | 0.93 | -0.001 | 0.89 | 0.076  | <b>0.03</b> | 0.57 | 0.02 | 5.5x10 <sup>-11</sup> | 0.0 | 0.336 |
| rs2176598* | <i>HSD17B12</i>  | T/C | 0.52        | 0.00  | 0.000  | 0.99 | -0.002 | 0.76 | -0.066 | 0.05        | 0.20 | 0.01 | 3.5x10 <sup>-8</sup>  | 0.0 | 0.726 |
| rs7138803  | <i>FAIM2</i>     | A/G | 0.11        | -0.01 | 0.000  | 0.99 | -0.003 | 0.77 | 0.008  | 0.88        | 0.44 | 0.03 | 5.1x10 <sup>-26</sup> | 0.0 | 0.358 |
| rs12444979 | <i>GPRC5B</i>    | C/T | >0.99       | -     | -      | -    | -      | -    | -      | -           | 0.87 | 0.04 | 1.1x10 <sup>-18</sup> | -   | -     |
| rs2287019  | <i>QPCTL</i>     | C/T | >0.99       | -     | -      | -    | -      | -    | -      | -           | 0.85 | 0.04 | 1.7x10 <sup>-18</sup> | -   | -     |
| rs13191362 | <i>PARK2</i>     | A/G | >0.99       | -     | -      | -    | -      | -    | -      | -           | 0.80 | 0.03 | 1.1x10 <sup>-9</sup>  | -   | -     |
| rs11727676 | <i>HHIP</i>      | T/C | >0.99       | -     | -      | -    | -      | -    | -      | -           | 0.92 | 0.04 | 6.2x10 <sup>-9</sup>  | -   | -     |
| rs16907751 | <i>ZBTB10</i>    | C/T | >0.99       | -     | -      | -    | -      | -    | -      | -           | 0.96 | 0.03 | 2.1x10 <sup>-7</sup>  | -   | -     |
| rs7715256  | <i>GALNT10</i>   | G/T | >0.99       | -     | -      | -    | -      | -    | -      | -           | 0.45 | 0.02 | 8.9x10 <sup>-9</sup>  | -   | -     |
| rs13107325 | <i>SLC39A8</i>   | T/C | <0.01       | -     | -      | -    | -      | -    | -      | -           | 0.12 | 0.05 | 1.1x10 <sup>-12</sup> | -   | -     |
| rs571312   | <i>MC4R</i>      | A/C | <0.01       | -     | -      | -    | -      | -    | -      | -           | 0.28 | 0.05 | 1.1x10 <sup>-56</sup> | -   | -     |
| rs2650492  | <i>SBK1</i>      | A/G | <0.01       | -     | -      | -    | -      | -    | -      | -           | 0.31 | 0.02 | 1.3x10 <sup>-9</sup>  | -   | -     |
| rs2033529  | <i>TDRG1</i>     | G/A | <0.01       | -     | -      | -    | -      | -    | -      | -           | 0.26 | 0.02 | 1.4x10 <sup>-8</sup>  | -   | -     |
| rs887912   | <i>FANCL</i>     | T/C | mono        | -     | -      | -    | -      | -    | -      | -           | 0.32 | 0.02 | 1.1x10 <sup>-11</sup> | -   | -     |
| rs11847697 | <i>PRKD1</i>     | T/C | mono        | -     | -      | -    | -      | -    | -      | -           | 0.04 | 0.04 | 2.6x10 <sup>-7</sup>  | -   | -     |
| rs17024258 | <i>GNAT2</i>     | T/C | mono        | -     | -      | -    | -      | -    | -      | -           | 0.04 | 0.06 | 7.3x10 <sup>-8</sup>  | -   | -     |
| rs7899106  | <i>GRID1</i>     | G/A | mono        | -     | -      | -    | -      | -    | -      | -           | 0.05 | 0.04 | 1.3x10 <sup>-8</sup>  | -   | -     |
| rs2176040  | <i>LOC646736</i> | A/G | mono        | -     | -      | -    | -      | -    | -      | -           | 0.39 | 0.01 | 1.3x10 <sup>-6</sup>  | -   | -     |
| rs4836133  | <i>ZNF608</i>    | A/C | Tri-allelic | -     | -      | -    | -      | -    | -      | -           | 0.41 | 0.02 | 4.2x10 <sup>-6</sup>  | -   | -     |

Data are given for the analysis in full-heritage Pima Indians (n as indicated). R: risk allele; N: non-risk allele; RAF: risk allele frequency. The risk allele is defined as the allele with higher risk for BMI in Europeans. Beta and *p* value are adjusted for age, sex, birth year and the first five genetic principal components. Max-BMI is the maximum lifetime BMI (kg/m<sup>2</sup>) recorded at age  $\geq 15$  years. Max-BMI (non-diabetic) is the maximum BMI recorded at a non-diabetic exam at age  $\geq 15$  years. The maximum BMI z-score was identified between the ages of 5 and 15 years. BMI is log<sub>e</sub>-transformed before analyses to approximate a normal distribution and beta presents as log<sub>e</sub>-scale. Data for meta-analysis of GIANT in Europeans are derived from the public database and beta coefficients are expressed in SD units by inverse Gaussian transformation of BMI. For inclusion in heterogeneity analyses between Pima Indians and Europeans, beta coefficients of maximum BMI in analyses of Pima Indians are also transformed to SD units as conducted in the meta-analysis of GIANT [and presented as beta (SD)]. I<sup>2</sup> represents the percentage of variance in the effect attributable to heterogeneity between Pima Indians and Europeans, and *P*<sub>het</sub> is the *p* value for the null hypothesis that the two betas are equal. \*A proxy SNP was

used for genotyping. -: SNPs with mAF<0.01 or monomorphic were omitted from data analysis. Significant  $p$ -values are reported in bold type. Bold values:  $p \leq 0.05$ .

**Table S3:** Analysis of 98 established BMI SNPs with T2D in longitudinally studied full-heritage Pima Indians

| Lead SNP    | Locus            | Full-heritage Pima Indians |                 |                  |              |
|-------------|------------------|----------------------------|-----------------|------------------|--------------|
|             |                  | Allele<br>R/N              | T2D<br>(n=3719) |                  |              |
|             |                  |                            | RAF             | OR (95% CI)      | <i>p</i>     |
| rs2867125   | <i>TMEM18</i>    | C/T                        | 0.86            | 1.02 (0.89-1.18) | 0.75         |
| rs7903146   | <i>TCF7L2</i>    | C/T                        | 0.92            | 0.91 (0.76-1.09) | 0.30         |
| rs13041126  | <i>MRPS33P4</i>  | T/C                        | 0.67            | 1.02 (0.91-1.14) | 0.71         |
| rs12885454  | <i>PRKD1</i>     | C/A                        | 0.78            | 1.07 (0.95-1.22) | 0.27         |
| rs6091540   | <i>ZFP64</i>     | C/T                        | 0.67            | 1.06 (0.95-1.18) | 0.32         |
| rs7193144   | <i>FTO</i>       | C/T                        | 0.14            | 1.21 (1.05-1.40) | <b>0.008</b> |
| rs977747    | <i>TAL1</i>      | T/G                        | 0.74            | 1.06 (0.95-1.19) | 0.31         |
| rs9641123*  | <i>CALCR</i>     | C//G                       | 0.09            | 1.17 (0.94-1.45) | 0.16         |
| rs10938397  | <i>GNPDA2</i>    | G/A                        | 0.31            | 1.16 (1.00-1.25) | <b>0.05</b>  |
| rs17203016  | <i>CREB1</i>     | G/A                        | 0.15            | 1.14 (0.96-1.35) | 0.15         |
| rs10733682  | <i>LMX1B</i>     | A/G                        | 0.75            | 1.07 (0.92-1.24) | 0.38         |
| rs2531995   | <i>ADCY9</i>     | T/C                        | 0.18            | 1.07 (0.91-1.27) | 0.40         |
| rs758747    | <i>NLRC3</i>     | T/C                        | 0.11            | 1.15 (0.94-1.40) | 0.18         |
| rs7164727*  | <i>ADPGK</i>     | T/C                        | 0.40            | 0.93 (0.82-1.04) | 0.21         |
| rs9914578*  | <i>SMG6</i>      | G/C                        | 0.16            | 0.97 (0.82-1.13) | 0.68         |
| rs10150332* | <i>NRXN3</i>     | C/T                        | 0.36            | 1.09 (0.96-1.23) | 0.18         |
| rs4740619   | <i>C9ORF93</i>   | T/C                        | 0.04            | 0.88 (0.63-1.23) | 0.46         |
| rs6477694*  | <i>EPB41LAB</i>  | C/T                        | 0.49            | 1.07 (0.95-1.20) | 0.23         |
| rs1460676*  | <i>FIGN</i>      | C/T                        | 0.07            | 1.22 (0.97-1.55) | 0.10         |
| rs29941     | <i>KCTD15</i>    | G/A                        | 0.32            | 1.09 (0.95-1.25) | 0.23         |
| rs7239883*  | <i>LOC284260</i> | G/A                        | 0.05            | 0.82 (0.63-1.08) | 0.16         |
| rs16851483* | <i>RASA2</i>     | T/G                        | 0.52            | 1.07 (0.95-1.20) | 0.29         |
| rs1514175   | <i>TNNI3K</i>    | A/G                        | 0.74            | 1.05 (0.90-1.23) | 0.52         |
| rs6465468*  | <i>ASB4</i>      | T/G                        | 0.13            | 1.02 (0.85-1.21) | 0.85         |
| rs6804842   | <i>RARB</i>      | G/A                        | 0.58            | 1.04 (0.92-1.17) | 0.53         |
| rs2241423   | <i>MAP2K5</i>    | G/A                        | 0.12            | 1.01 (0.82-1.26) | 0.89         |
| rs2112347   | <i>POC5</i>      | T/G                        | 0.82            | 1.00 (0.84-1.20) | 0.98         |
| rs7243357   | <i>GRP</i>       | T/G                        | 0.55            | 1.05 (0.93-1.19) | 0.40         |
| rs2815752   | <i>NEGR1</i>     | A/G                        | 0.91            | 0.94 (0.75-1.18) | 0.60         |
| rs3817334   | <i>MTCH2</i>     | T/C                        | 0.50            | 0.98 (0.86-1.13) | 0.83         |
| rs9540493*  | <i>MIR548X2</i>  | A/G                        | 0.58            | 0.99 (0.88-1.12) | 0.92         |
| rs7503807   | <i>RPTOR</i>     | A//C                       | 0.96            | 1.03 (0.76-1.41) | 0.83         |
| rs2820292   | <i>NAV1</i>      | C/A                        | 0.38            | 1.01 (0.89-1.15) | 0.85         |
| rs9400239*  | <i>FOXO3</i>     | C/T                        | 0.63            | 0.95 (0.84-1.07) | 0.41         |



|             |                  |     |      |                  |              |
|-------------|------------------|-----|------|------------------|--------------|
| rs713586    | <i>ADCY3</i>     | C/T | 0.18 | 0.95 (0.81-1.12) | 0.56         |
| rs11583200* | <i>ELAVL4</i>    | C/T | 0.55 | 1.04 (0.92-1.17) | 0.56         |
| rs4771122*  | <i>MTIF3</i>     | G/A | 0.08 | 0.94 (0.75-1.17) | 0.58         |
| rs1928295*  | <i>TLR4</i>      | T/C | 0.66 | 0.97 (0.86-1.10) | 0.66         |
| rs7359397   | <i>SH2B1</i>     | T/C | 0.73 | 0.88 (0.75-1.02) | 0.09         |
| rs657452*   | <i>AGBL4</i>     | A/G | 0.39 | 1.06 (0.94-1.20) | 0.34         |
| rs1528435*  | <i>UBE2E3</i>    | T/C | 0.84 | 1.03 (0.87-1.20) | 0.76         |
| rs11688816* | <i>EHBPI</i>     | G/A | 0.58 | 0.87 (0.77-0.99) | <b>0.03</b>  |
| rs206936    | <i>NUDT3</i>     | G/A | 0.65 | 0.96 (0.83-1.10) | 0.53         |
| rs17724992* | <i>PGPEP1</i>    | A/G | 0.63 | 1.11 (0.98-1.25) | 0.10         |
| rs7989336   | <i>HS6ST3</i>    | A/G | 0.01 | 1.26 (0.47-3.36) | 0.64         |
| rs1167827   | <i>HIP1</i>      | G/A | 0.08 | 0.91 (0.73-1.14) | 0.43         |
| rs11057405* | <i>CLIP1</i>     | G/A | 0.93 | 1.04 (0.85-1.28) | 0.69         |
| rs1000940   | <i>RABEP1</i>    | G/A | 0.27 | 0.82 (0.71-0.95) | <b>0.006</b> |
| rs10767664  | <i>BDNF</i>      | A/T | 0.14 | 0.99 (0.80-1.21) | 0.91         |
| rs10968576* | <i>LINGO2</i>    | G/A | 0.21 | 1.03 (0.89-1.19) | 0.68         |
| rs492400*   | <i>USP37</i>     | C/T | 0.31 | 1.07 (0.94-1.22) | 0.29         |
| rs2245368   | <i>PMS2P11</i>   | C/T | 0.61 | 1.06 (0.94-1.20) | 0.33         |
| rs17001654* | <i>SCARB2</i>    | G/C | 0.16 | 1.00 (0.86-1.18) | 0.96         |
| rs10132280* | <i>STXBP6</i>    | C/A | 0.67 | 1.02 (0.90-1.16) | 0.71         |
| rs3849570*  | <i>GBE1</i>      | A/C | 0.46 | 0.99 (0.88-1.12) | 0.89         |
| rs9925964*  | <i>KAT8</i>      | A/G | 0.35 | 0.98 (0.86-1.10) | 0.70         |
| rs12286929  | <i>CADM1</i>     | G/A | 0.72 | 1.18 (1.03-1.34) | <b>0.02</b>  |
| rs13078807  | <i>CADM2</i>     | G/A | 0.01 | 1.63 (0.65-4.08) | 0.29         |
| rs2365389*  | <i>FHIT</i>      | C/T | 0.07 | 1.14 (0.91-1.43) | 0.25         |
| rs987237*   | <i>TFAP2B</i>    | G/A | 0.58 | 1.10 (0.97-1.24) | 0.13         |
| rs2836754*  | <i>ETS2</i>      | C/T | 0.13 | 0.86 (0.72-1.03) | 0.10         |
| rs2890652   | <i>LRP1B</i>     | C/T | 0.01 | 1.72 (0.85-3.48) | 0.13         |
| rs13201877  | <i>IFNGR1</i>    | G/A | 0.03 | 1.03 (0.70-1.52) | 0.89         |
| rs4735692*  | <i>HNF4G</i>     | A/G | 0.06 | 0.96 (0.75-1.23) | 0.75         |
| rs9374842*  | <i>LOC285762</i> | T/C | 0.86 | 0.97 (0.82-1.16) | 0.77         |
| rs4929949   | <i>RPL27A</i>    | C/T | 0.67 | 1.04 (0.90-1.20) | 0.62         |
| rs2080454*  | <i>CBLN1</i>     | C/A | 0.65 | 0.93 (0.82-1.05) | 0.25         |
| rs9816226*  | <i>ETV5</i>      | T/A | 0.07 | 1.15 (0.91-1.45) | 0.26         |
| rs1441264*  | <i>MIR548A2</i>  | A/G | 0.73 | 1.15 (1.01-1.31) | <b>0.04</b>  |
| rs11126666  | <i>KCNK3</i>     | A/G | 0.04 | 0.97 (0.68-1.38) | 0.85         |
| rs3810291   | <i>TMEM160</i>   | A/G | 0.66 | 0.98 (0.86-1.10) | 0.71         |
| rs543874*   | <i>SEC16B</i>    | G/A | 0.21 | 0.98 (0.84-1.13) | 0.75         |
| rs2033732*  | <i>RALYL</i>     | C/T | 0.87 | 1.04 (0.87-1.23) | 0.69         |
| rs4787491*  | <i>INO80E</i>    | G/A | 0.16 | 1.01 (0.85-1.18) | 0.95         |
| rs17381664* | <i>ZZZ3</i>      | C/T | 0.55 | 1.03 (0.91-1.16) | 0.62         |
| rs11191560* | <i>NT5C2</i>     | C/T | 0.25 | 0.93 (0.81-1.07) | 0.32         |
| rs3736485*  | <i>DMXL2</i>     | A/G | 0.46 | 1.02 (0.90-1.14) | 0.79         |

|            |                  |     |             |                  |      |
|------------|------------------|-----|-------------|------------------|------|
| rs7599312  | <i>ERBB4</i>     | G/A | 0.93        | 1.01 (0.81-1.27) | 0.92 |
| rs17094222 | <i>HIF1AN</i>    | C/T | 0.33        | 0.90 (0.80-1.02) | 0.10 |
| rs1555543  | <i>PTBP2</i>     | C/A | 0.54        | 0.99 (0.86-1.13) | 0.86 |
| rs2176598* | <i>HSD17B12</i>  | T/C | 0.52        | 0.98 (0.87-1.11) | 0.74 |
| rs7138803  | <i>FAIM2</i>     | A/G | 0.11        | 1.14 (0.93-1.39) | 0.19 |
| rs12444979 | <i>GPRC5B</i>    | C/T | >0.99       | -                | -    |
| rs2287019  | <i>QPCTL</i>     | C/T | >0.99       | -                | -    |
| rs13191362 | <i>PARK2</i>     | A/G | >0.99       | -                | -    |
| rs11727676 | <i>HHIP</i>      | T/C | >0.99       | -                | -    |
| rs16907751 | <i>ZBTB10</i>    | C/T | >0.99       | -                | -    |
| rs7715256  | <i>GALNT10</i>   | G/T | >0.99       | -                | -    |
| rs13107325 | <i>SLC39A8</i>   | T/C | <0.01       | -                | -    |
| rs571312   | <i>MC4R</i>      | A/C | <0.01       | -                | -    |
| rs2650492  | <i>SBK1</i>      | A/G | <0.01       | -                | -    |
| rs2033529  | <i>TDRG1</i>     | G/A | <0.01       | -                | -    |
| rs887912   | <i>FANCL</i>     | T/C | mono        | -                | -    |
| rs11847697 | <i>PRKD1</i>     | T/C | mono        | -                | -    |
| rs17024258 | <i>GNAT2</i>     | T/C | mono        | -                | -    |
| rs7899106  | <i>GRID1</i>     | G/A | mono        | -                | -    |
| rs2176040  | <i>LOC646736</i> | A/G | mono        | -                | -    |
| rs4836133  | <i>ZNF608</i>    | A/C | Tri-allelic | -                | -    |

Data are given for the analysis in full-heritage Pima Indians (n as indicated). R: risk allele; N: non-risk allele; RAF: risk allele frequency. The risk allele is defined as the allele with higher risk for BMI in Europeans. Odds ratios (OR) for T2D are given as per copy of this allele. *P* values for T2D were adjusted for age, sex, birth year and the first five genetic principal components. For those SNPs associated with BMI ( $p < 0.05$ ), T2D associations were additionally adjusted for maximum BMI. \* A proxy SNP was used for genotyping. -: SNPs with  $mAF < 0.01$  or monomorphic were omitted for data analysis. Bold values:  $p \leq 0.05$ .

Figure S1.

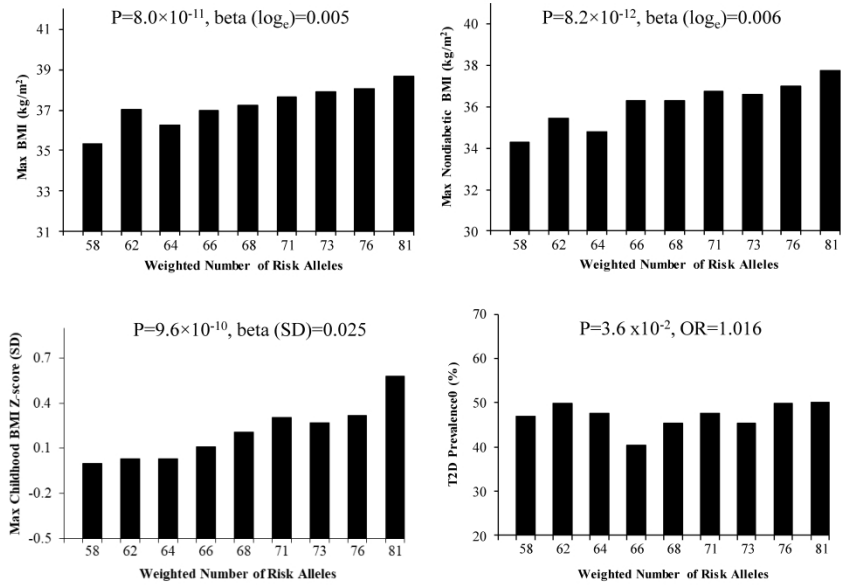

The aggregate effect of 82 lead SNPs on maximum BMI in adulthood, maximum BMI recorded at a non-diabetic exam, maximum BMI z-score in childhood and T2D in full-heritage Pima Indians. The GRS was created by summing the number of the risk alleles of all 82 SNPs with a  $mAF \geq 0.01$ , weighted by the published effect size, divided by the sum of the weights.

254x190mm (600 x 600 DPI)

Figure S2.

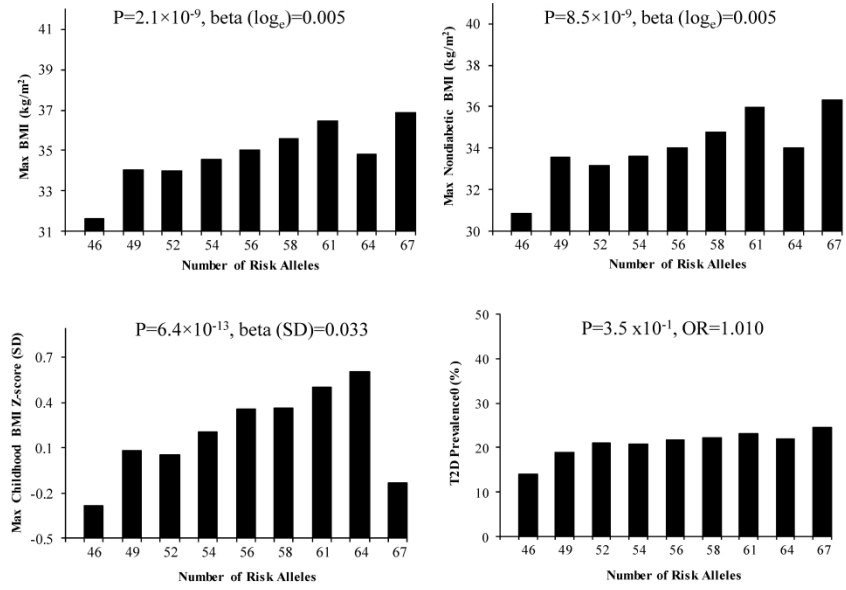

The aggregate effect of 82 lead SNPs on maximum BMI in adulthood, maximum BMI recorded at a non-diabetic exam, maximum BMI z-score in childhood and T2D in 3298 mixed-heritage Pima Indians.

254x190mm (600 x 600 DPI)
